# Supplementary material for: A biomimetic ant silk fiber-based triboelectric nanogenerator: toward advanced tactile sensing technology
Source: Royal Society of Chemistry journal article supplement (doi:10.1039/d4se01591f), 2024-11-27
Supplement: d4se01591f1.pdf [file d4se01591f1.pdf]

## Supporting Information

### Biomimetic Ant Silk Fiber Mat-based Robust Triboelectric Nanogenerator for Advanced Tactile Sensing Applications

Rumana Farheen Sagade Muktar Ahmed <sup>a</sup>, Mizba Tazleem Sagade Mokthar Ahamed <sup>b</sup>,  
Sangamesha Madanahalli Ankanathappa <sup>c, \*\*</sup>, Krishnaveni Sannathammegowda <sup>a, \*</sup>

**Table S1.** Parameters used to perform the COMSOL simulation of PVC-TENG

| Parameters                                          | Values                                  |
|-----------------------------------------------------|-----------------------------------------|
| The dielectric constant of the air ( $\epsilon_0$ ) | $8.854 \times 10^{-12} \text{ Fm}^{-1}$ |
| The dielectric constant of the SFM ( $\epsilon_r$ ) | 1.73                                    |
| The thickness of the air gap ( $x_{\text{max}}$ )   | 10 mm                                   |
| The thickness of the PU film ( $x_{\text{PU}}$ )    | 0.12 mm                                 |
| The thickness of the SFM film ( $x_{\text{SFM}}$ )  | 0.08 mm                                 |
| Area of the device (A)                              | $40 \times 40 \text{ mm}^2$             |
| Surface charge density                              | $5 \mu\text{C}/\text{cm}^2$             |

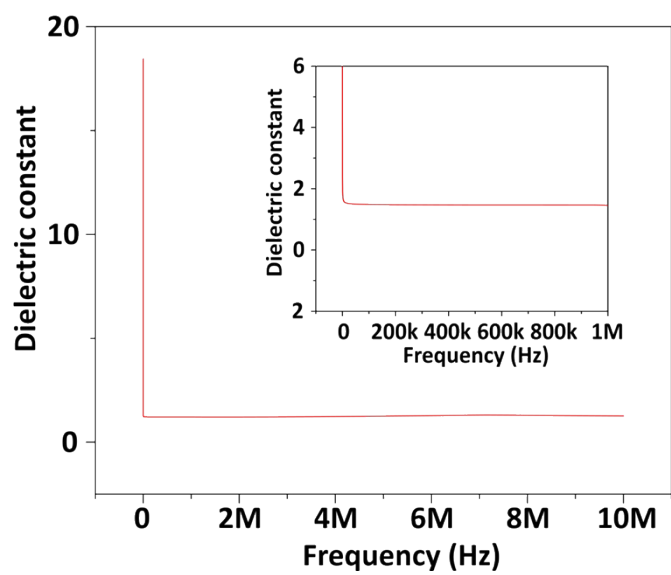

**Figure S1.** Dielectric measurement of SFM film.
